# Supplementary material for: Ru, B Co-doped hollow structured iron phosphide as highly efficient electrocatalyst toward hydrogen generation in wide pH range
Source: Royal Society of Chemistry journal article supplement (doi:10.1039/d2ta03176k), 2022-01-01
Supplement: d2ta03176k1.pdf [file d2ta03176k1.pdf]

## *Supporting information*

### **Ru, B Co-doped Hollow Structured Iron Phosphide as Highly Efficient Electrocatalyst toward Hydrogen Generation in Wide pH Range**

Zixuan Wang<sup>1,#</sup>, Yonglong Wang<sup>1,#</sup>, Weiping Xiao<sup>2</sup>, Xinping Wang<sup>1</sup>, Yunlei Fu<sup>3</sup>, Guangrui Xu<sup>4</sup>, Zhenjiang Li<sup>4</sup>, Zexing Wu<sup>1,\*</sup>, Lei Wang<sup>1,3,\*</sup>

1. Key Laboratory of Eco-chemical Engineering, Ministry of Education, International Science and Technology Cooperation Base of Eco-chemical Engineering and Green Manufacturing, College of Chemistry and Molecular Engineering, Qingdao University of Science and Technology, Qingdao 266042, P. R. China. E-mail: splswzx@qust.edu.cn; inorchemwl@126.com

2. College of Science, Nanjing Forestry University, Nanjing, 210037, PR China

3. Shandong Engineering Research Center for Marine Environment Corrosion and Safety Protection, College of Environment and Safety Engineering, Qingdao University of Science and Technology, Qingdao, 266042, PR China.

4. College of Materials Science and Engineering, Qingdao University of Science and Technology, Qingdao, Shandong province, 266061, PR China

# The authors contributed equally to this work.

## **Physical Characterization**

The morphology and lattice striations of the catalysts were characterized by scanning electron microscopy (SEM) and transmission electron microscopy (TEM) and high-resolution transmission electron microscopy (HRTEM), the crystal structure of the catalysts was determined by X-ray diffraction (XRD) and the elemental composition of the catalysts was studied by X-ray photoelectron spectroscopy (XPS), the elemental distribution of the catalyst was characterized using an energy dispersive X-ray spectrometer (EDX).

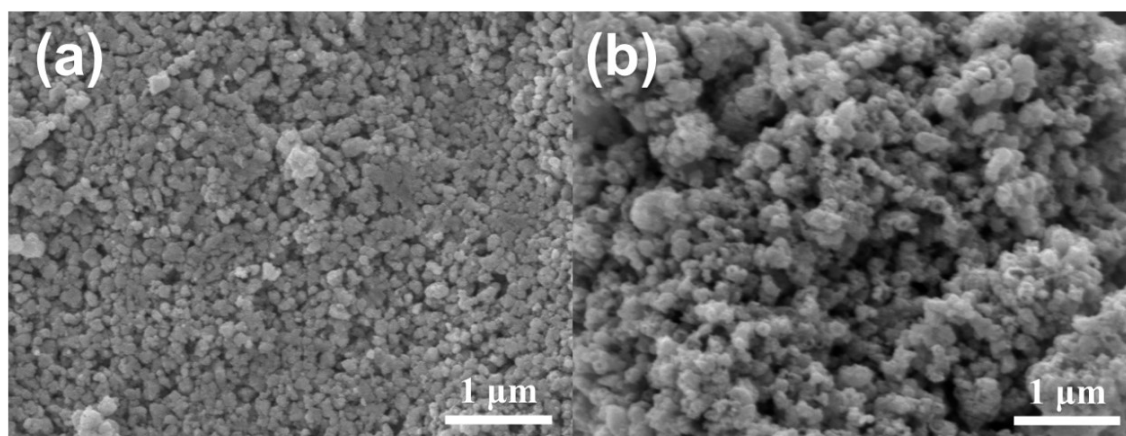

**Fig. S1.** SEM images of a) B/Ru-FeP. b) H-B/Ru-FeP.

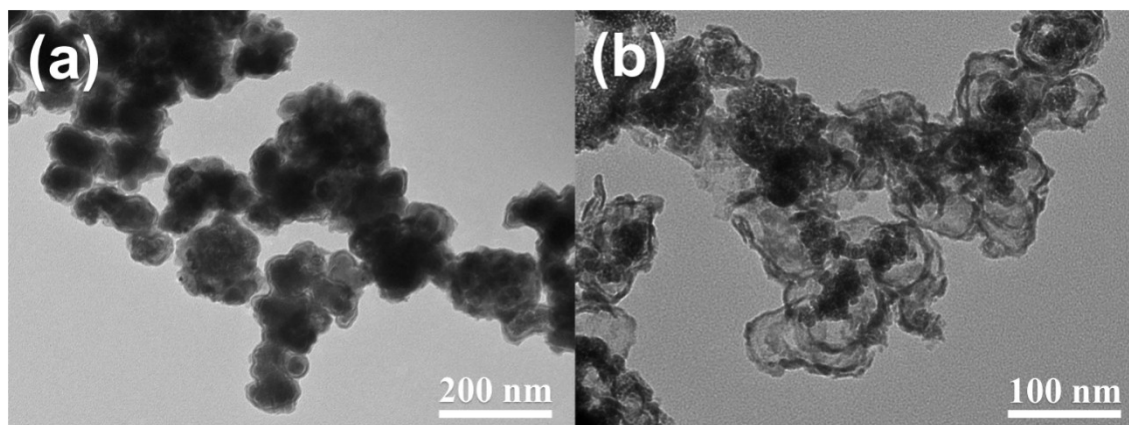

**Fig. S2.** TEM images of a) B/Ru-FeP. b) H-B/Ru-FeP.

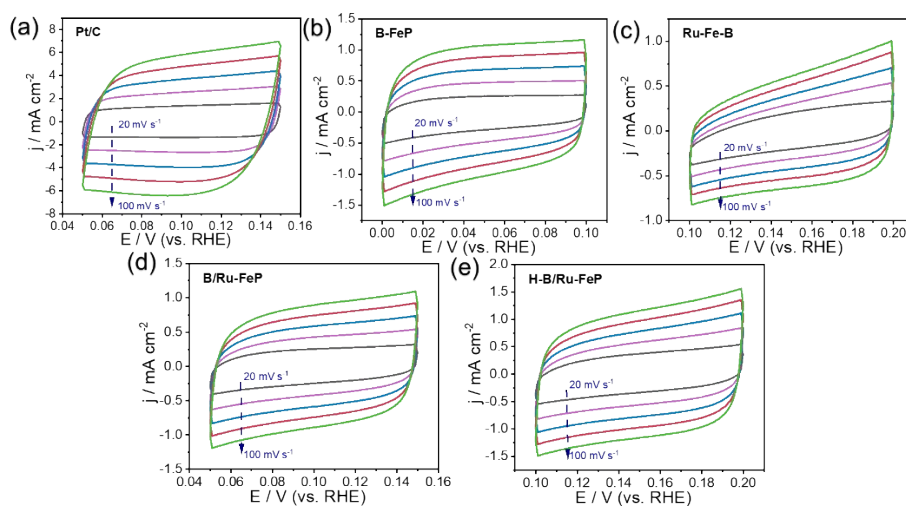

**Fig. S3** Cyclic voltammety profiles for (a) Pt/C (b) B-FeP (c) Ru-Fe-B (d) B/Ru-FeP and (e) H-B/Ru-FeP at different scan rates (20, 40, 60, 80 and 100  $\text{mV s}^{-1}$ ) in a 0.5 M  $\text{H}_2\text{SO}_4$  solution.

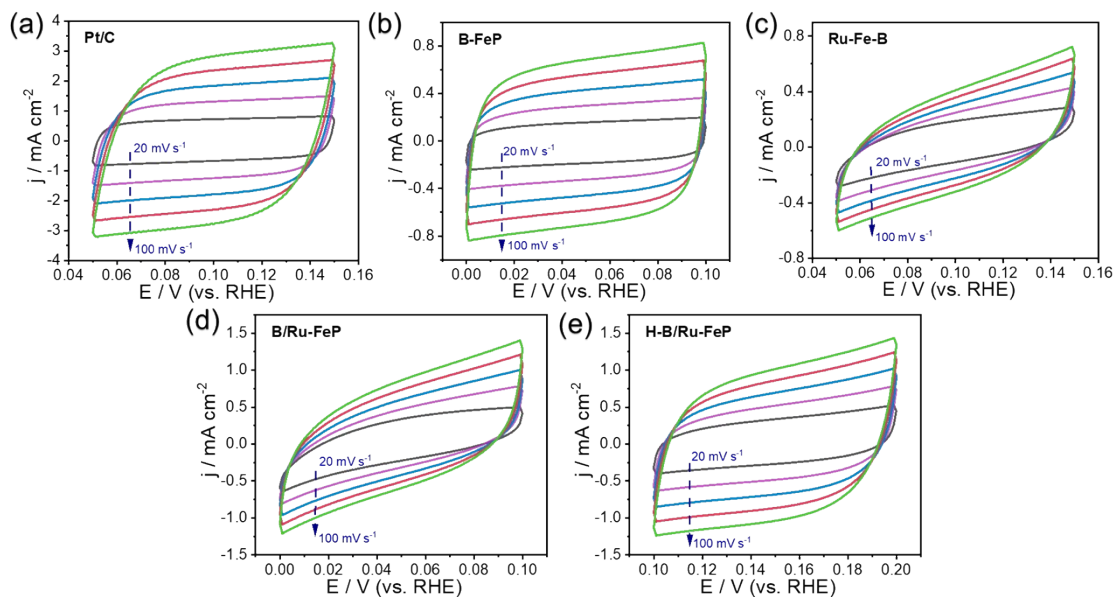

**Fig. S4** Cyclic voltammetry profiles for (a) Pt/C (b) B-FeP (c) Ru-Fe-B (d) B/Ru-FeP and (e) H-B/Ru-FeP at different scan rates (20, 40, 60, 80 and 100 mVs<sup>-1</sup>) in a 1 M PBS solution.

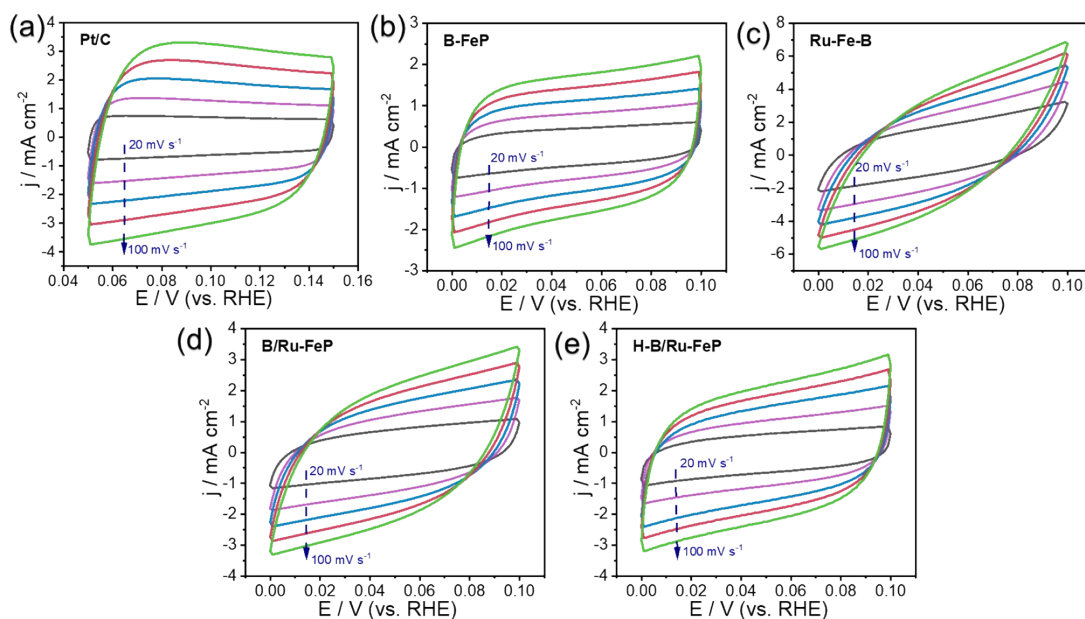

**Fig. S5** Cyclic voltammetry profiles for (a) Pt/C (b) B-FeP (c) Ru-Fe-B (d) B/Ru-FeP and (e) H-B/Ru-FeP at different scan rates (20, 40, 60, 80 and 100 mVs<sup>-1</sup>) in a 1 M KOH solution.

**Table S1.** Comparison of HER activity in 0.5 M H<sub>2</sub>SO<sub>4</sub> for various electrocatalysts.

| Electrocatalysts        | Overpotential at<br>10 mA cm <sup>-2</sup> | Tafel slope (mV<br>dec <sup>-1</sup> ) | Reference |
|-------------------------|--------------------------------------------|----------------------------------------|-----------|
| H-B/Ru-FeP              | 29 mV                                      | 35.2                                   | This work |
| RuP <sub>2</sub> @NPC   | 38 mV                                      | 38                                     | 1         |
| FeP nanorod array       | 58 mV                                      | 45                                     | 2         |
| FeP/CF                  | 88 mV                                      | 35.5                                   | 3         |
| Fe-P/WO <sub>2</sub>    | 98 mV                                      | 47                                     | 4         |
| Ru-MC                   | 40 mV                                      | 42                                     | 5         |
| RuFeP-NCs/CNF           | 65.8 mV                                    | 43.4                                   | 6         |
| P-Ru/C                  | 74 mV                                      | 51                                     | 7         |
| Ni@Ni <sub>2</sub> P-Ru | 51 mV                                      | 35                                     | 8         |

**Table S2.** Comparison of HER activity in 1 M PBS for various electrocatalysts.

| Electrocatalysts       | Overpotential at<br>10 mA cm <sup>-2</sup> | Tafel slope (mV<br>dec <sup>-1</sup> ) | Reference |
|------------------------|--------------------------------------------|----------------------------------------|-----------|
| H-B/Ru-FeP             | 86                                         | 72.5                                   | This work |
| FeP/NCNSs              | 205                                        | 70                                     | 9         |
| Ni-FeP/C               | 117                                        | 70                                     | 10        |
| 0.02-Ru@CN-6           | 82                                         | 103                                    | 11        |
| RuP@NPC                | 110                                        | 57                                     | 12        |
| Ru-NiFeP/NF            | 105.1                                      | 82.7                                   | 13        |
| FePSe <sub>3</sub> /NC | 140.1                                      | 167                                    | 14        |
| Co-Fe-P                | 138                                        | 138                                    | 15        |
| RuP <sub>2</sub> @NPC  | 57                                         | 87                                     | 1         |

**Table S3.** Comparison of HER activity in 1 M KOH for various electrocatalysts.

| Electrocatalysts          | Overpotential at<br>10 mA cm <sup>-2</sup> | Tafel slope (mV<br>dec <sup>-1</sup> ) | Reference |
|---------------------------|--------------------------------------------|----------------------------------------|-----------|
| H-B/Ru-FeP                | 110                                        | 76.7                                   | This work |
| FeB <sub>2</sub> NPs      | 61                                         | 87.5                                   | 16        |
| NiFeP@C                   | 160                                        | 78.5                                   | 17        |
| Ni <sub>3</sub> FeN       | 185                                        | 112.7                                  | 18        |
| Ni-Fe-P-350               | 182                                        | 85                                     | 19        |
| Fe-Co <sub>2</sub> P BNRs | 156                                        | 90                                     | 20        |
| P-Ru/C                    | 31                                         | 105                                    | 7         |
| FeP Nanocubes-CP          | 140                                        | 61.9                                   | 18        |
| FeCoP <sub>2</sub> @NPPC  | 150                                        | 79                                     | 21        |

**Table S4.** Comparison of overall water splitting activity in 1 M KOH for various electrocatalysts.

| Electrocatalysts                                   | Overpotential at 10 mA<br>cm <sup>-2</sup> | Reference |
|----------------------------------------------------|--------------------------------------------|-----------|
| H-B/Ru-FeP                                         | 1.54                                       | This Work |
| Ni-Fe-P/NF <sub>30</sub>                           | 1.58                                       | 22        |
| Co-Mo-B-P/CF                                       | 1.59                                       | 23        |
| Fe-Ni <sub>2</sub> P/MoS <sub>x</sub> /NF          | 1.61                                       | 24        |
| FCP@NG                                             | 1.63                                       | 25        |
| δ-FeOOH NSs                                        | 1.62                                       | 26        |
| Ni <sub>0.7</sub> Fe <sub>0.3</sub> S <sub>2</sub> | 1.63                                       | 27        |
| NiFe-Se/C                                          | 1.68                                       | 28        |
| Ni-Fe-P-350                                        | 1.67                                       | 19        |

## References

1. Z. Pu, I. S. Amiin, Z. Kou, W. Li and S. Mu, *Angew. Chem. Int. Ed.*, 2017, **56**, 11559-11564.
2. Y. Liang, Q. Liu, A. M. Asiri, X. Sun and Y. Luo, *ACS Catal.*, 2014, **4**, 4065-4069.
3. Y. Yan, B. Y. Xia, X. Ge, Z. Liu, A. Fisher and X. Wang, *Chem. Eur. J.*, 2015, **21**, 18062-18067.
4. X. Sun, F. Yang, Z. Liu, L. Zeng and X. Cui, *Chem. Lett.*, 2019, **48**, 1232-1235.
5. Y. Jiang, Y. Qin, W. Luo, H. Liu, W. Shen, Y. Jiang, M. Li and R. He, *ChemElectroChem*, 2022, **9**, e202101580.
6. B. Yang, J. Xu, D. Bin, J. Wang, J. Zhao, Y. Liu, B. Li, X. Fang, Y. Liu, L. Qiao, L. Liu and B. Liu, *Appl. Catal. B-Environ.*, 2021, **283**, 119583.
7. Y. Zhao, X. Wang, G. Cheng and W. Luo, *ACS Catal.*, 2020, **10**, 11751-11757.
8. Y. Liu, S. Liu, Y. Wang, Q. Zhang, L. Gu, S. Zhao, D. Xu, Y. Li, J. Bao and Z. Dai, *J. Am. Chem. Soc.*, 2018, **140**, 2731-2734.
9. Y. Yu, Z. Peng, M. Asif, H. Wang, W. Wang, Z. Wu, Z. Wang, X. Qiu, H. Tan and H. Liu, *ACS Sustain. Chem. Eng.*, 2018, **6**, 11587-11594.



10. X. F. Lu, L. Yu and X. W. Lou, *Sci. Adv.*, 2019, **5**, eaav6009.
11. N. Wang, X. Bo and M. Zhou, *J. Colloid Interface Sci.*, 2021, **604**, 885-893.
12. J. Chi, W. Gao, J. Lin, B. Dong, K. Yan, J. Qin, B. Liu, Y. Chai and C. Liu, *ChemSusChem*, 2018, **11**, 743-752.
13. Y. Lin, M. Zhang, L. Zhao, L. Wang, D. Cao and Y. Gong, *Appl. Surf. Sci.*, 2021, **536**, 147952.
14. J. Yu, W. Li, H. Zhang, F. Zhou, R. Li, C. Xu, L. Zhou, H. Zhong and J. Wang, *Nano Energy*, 2019, **57**, 222-229.
15. J. Chen, J. Liu, J. Xie, H. Ye, X. Fu, R. Sun and C. Wong, *Nano Energy*, 2019, **56**, 225-233.
16. H. Li, P. Wen, Q. Li, C. Dun, J. Xing, C. Lu, S. Adhikari, L. Jiang, D. L. Carroll and S. M. Geyer, *Adv. Energy Mater.*, 2017, **7**, 1700513.
17. Q. Kang, M. Li, J. Shi, Q. Lu and F. Gao, *ACS Appl. Mater. Interfaces*, 2020, **12**, 19447-19456.
18. X. Liu, X. Lv, P. Wang, Q. Zhang, B. Huang, Z. Wang, Y. Liu, Z. Zheng and Y. Dai, *Electrochim. Acta.*, 2020, **333**, 135488.
19. C. Xuan, J. Wang, W. Xia, Z. Peng, Z. Wu, W. Lei, K. Xia, H. L. Xin and D. Wang, *ACS Appl. Mater. Interfaces*, 2017, **9**, 26134-26142.
20. Y. Lin, K. Sun, X. Chen, C. Chen, Y. Pan, X. Li and J. Zhang, *J. Energy Chem.*, 2021, **55**, 92-101.
21. Y. Wang, Z. Yang, D. Yang, L. Zhao, X. Shi, G. Yang and B. Han, *ACS Appl. Mater. Interfaces*, 2021, **13**, 8832-8843.
22. K. Wang, K. Sun, T. Yu, X. Liu, G. Wang, L. Jiang and G. Xie, *J. Mater. Chem. A.*, 2019, **7**, 2518-2523.
23. Y. Wei, P. Zou, Y. Yue, M. Wang, W. Fu, S. Si, L. Wei, X. Zhao, G. Hu and H. L. Xin, *ACS Appl. Mater. Interfaces*, 2021, **13**, 20024-20033.
24. X. Zhang, C. Liang, X. Qu, Y. Ren, J. Yin, W. Wang, M. Yang, W. Huang and X. Dong, *Adv. Mater. Interfaces*, 2020, **7**, 1901926.
25. Y. Lu, Y. Chen, K. Srinivas, Z. Su, X. Wang, B. Wang and D. Yang, *Electrochim. Acta*, 2020, **350**, 136338.
26. B. Liu, Y. Wang, H.-Q. Peng, R. Yang, Z. Jiang, X. Zhou, C.-S. Lee, H. Zhao and W. Zhang, *Adv. Mater.*, 2018, **30**, 1803144.
27. J. Yu, G. Cheng and W. Luo, *J. Mater. Chem. A.*, 2017, **5**, 15838-15844.
28. B. Xu, H. Yang, L. Yuan, Y. Sun, Z. Chen and C. Li, *J. Power Sources*, 2017, **366**, 193-199.
